# Supplementary material for: Cross-talk between the p38α and JNK MAPK Pathways Mediated by MAP Kinase Phosphatase-1 Determines Cellular Sensitivity to UV Radiation
Source: PubMed Central journal article supplement — J Biol Chem. 2010 Jun 11;285(34):25928–40. doi: 10.1074/jbc.M110.117911 (PMC2923983; doi:10.1074/jbc.m110.117911), 2010-06-11
Supplement: supp_M110.117911_jbc.M110.117911-1.pdf [file supp_M110.117911_jbc.M110.117911-1.pdf]

## Supplemental Data

Supplemental Figure S1

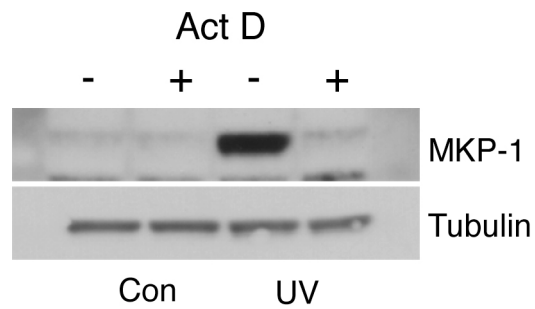

**Supplemental Fig. S1:** DUSP1/MKP-1 induction by UV radiation is abolished by transcriptional inhibition. Wild-type MEFs were exposed to 30 J/m<sup>2</sup> UV in the presence of either vehicle (DMSO) or 2 µg/ml actinomycin D and incubated at 37°C for 1 hr. Cells were then lysed, and proteins analysed by SDS-PAGE and Western blotting using the indicated antibodies.

## Supplemental Figure S2

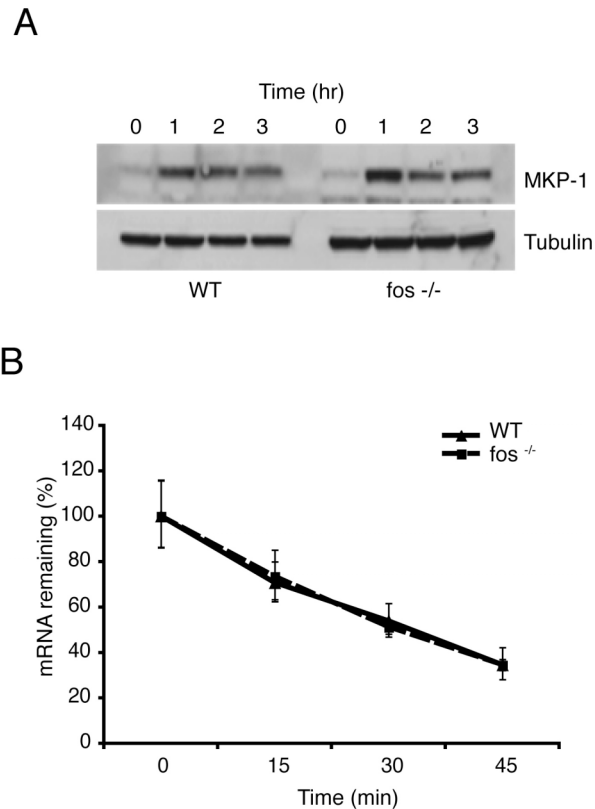

**Figure 2:** DUSP1/MKP-1 protein levels are somewhat increased by loss of c-fos but this is not due to increased mRNA stability. **A:** Wild-type (WT) and c-fos<sup>-/-</sup> MEFs were either mock irradiated or exposed to 30 J/m<sup>2</sup> UV and then incubated at 37°C for the indicated times. Cells were then lysed, and proteins analysed by SDS-PAGE and Western blotting using the indicated antibodies. **B:** Wild-type (WT) and c-fos<sup>-/-</sup> MEFs were either mock irradiated or exposed to 30 J/m<sup>2</sup> UV and then incubated at 37°C for one hour before addition of 2 µg/ml actinomycin D. Cells were then lysed at the indicated times, and DUSP1/MKP-1 mRNA levels were determined using quantitative RT-PCR. Mean values with associated errors are shown (mean ± SEM).
